# Supplementary material
Source: publisher figshare collection journal article supplement (https://acs.figshare.com/ndownloader/files/3781360)
Supplement: Supplementary file 1 [file 3781360]

## Supporting Information

### Highly Thermostable, Flexible and Conductive Films Prepared from Cellulose, Graphite and Polypyrrole Nanoparticles

*Jinghuan Chen,<sup>†</sup> Jikun Xu,<sup>†</sup> Kun Wang,<sup>\*†</sup> Xueren Qian,<sup>‡</sup> Runcang Sun<sup>\*†</sup>*

<sup>†</sup> Beijing Key Laboratory of Lignocellulosic Chemistry, Beijing Forestry University,  
Beijing 100083, China

<sup>‡</sup> Key Laboratory of Bio-Based Material Science and Technology of Ministry of  
Education, Northeast Forestry University, Harbin 150040, China

\*E-mail: wangkun@bjfu.edu.cn

rcsun3@bjfu.edu.cn

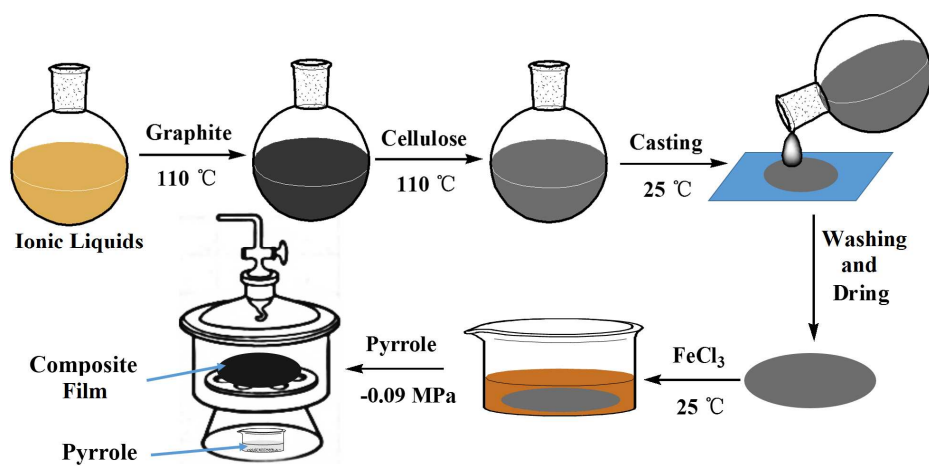

**Figure S1.** Preparation process of the cellulose/graphite/PPy composite films.

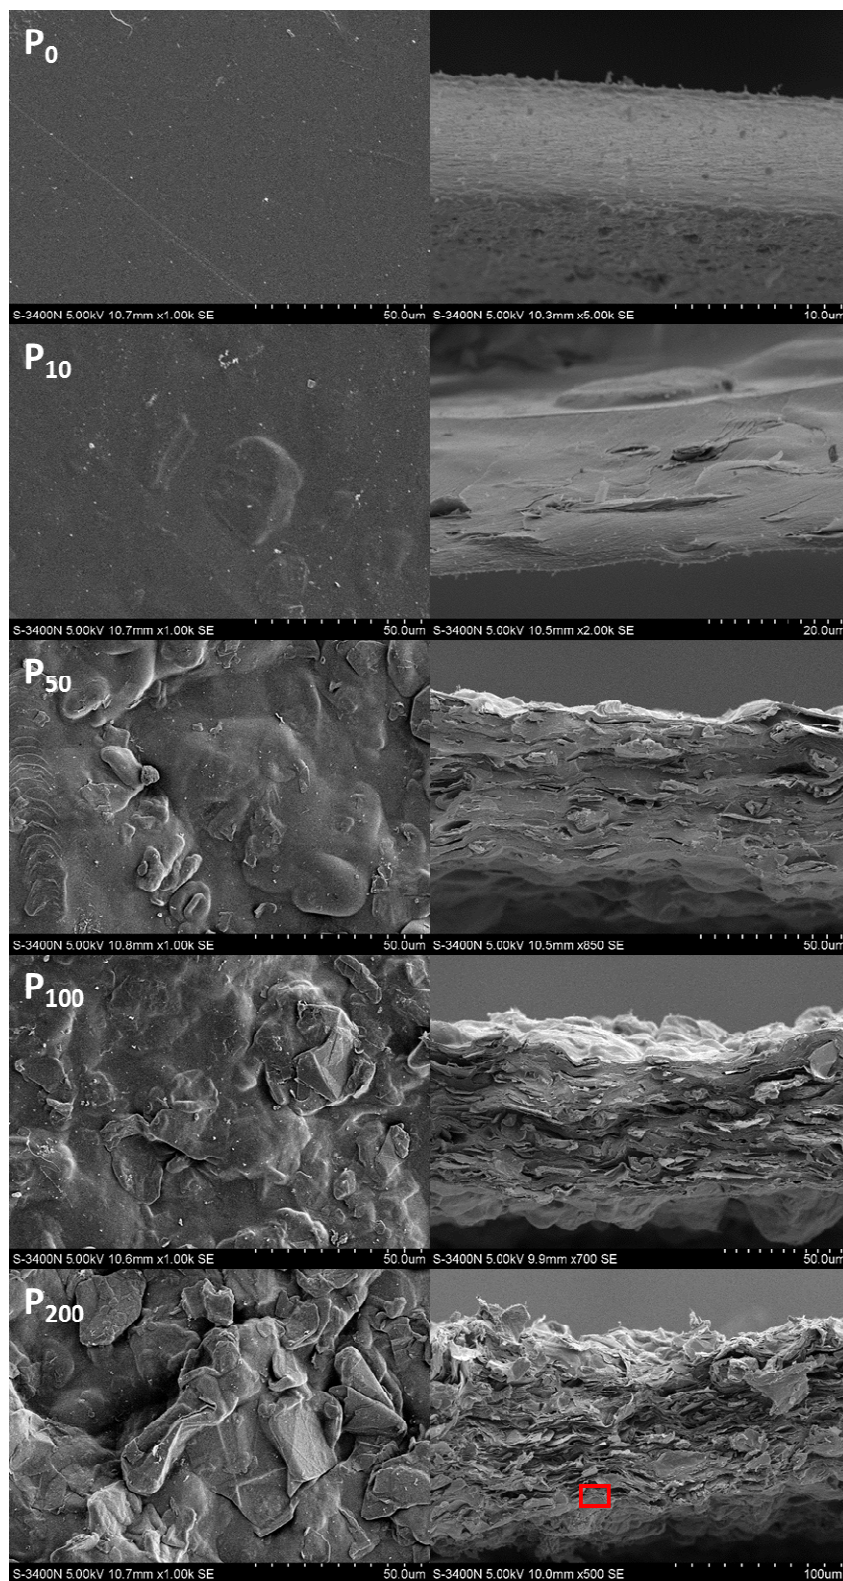

**Figure S2.** SEM micrographs of the surface and cross-section of composite films  $P_0$ ,  $P_{10}$ ,  $P_{50}$ ,  $P_{100}$  and  $P_{200}$  (the part framed in  $P_{200}$  was enlarged in Figure 4a).
